# Supplementary material for: Genome-wide mapping of Topoisomerase I activity sites reveal its role in chromosome segregation
Source: PubMed Central journal article supplement — Nucleic Acids Res. 2018 Dec 19;47(3):1416–27. doi: 10.1093/nar/gky1271 (PMC6379724; doi:10.1093/nar/gky1271), 2018-12-19
Supplement: gky1271_supplemental_files.pdf [file gky1271_supplemental_files.pdf]

**Table DS1: Oligonucleotides used for the study**

| <b>Sr. No.</b> | <b>Oligonucleotide name</b> | <b>Sequence (5'-3')</b>          |
|----------------|-----------------------------|----------------------------------|
| 1              | Motif validation_1          | CAGTGAGCGAGCTTCCGCTTGACATCCCAATA |
| 2              | Motif validation_2          | CAGTGAGCGAGCTTCCTCTTGACATCCCAATA |
| 3              | Motif validation_3          | CAGTGAGCGAGCTTCCTCTCGACATCCCAATA |
| 4              | Motif validation_4          | CAGTGAGCGAGCTTCCTCCCGACATCCCAATA |
| 5              | Motif validation_5          | TATTGGGATGTCAAGCGGAAGCTCGCTCACTG |
| 6              | Motif validation_6          | CGGTAATACAGATCGATTATGCCCAATAACC  |
| 7              | MSMEG_3902_binding          | TGGGTGAGATCAGCACGCTTCGCGAGATCCTG |
| 9              | MSMEG_5103_binding          | AGTGCTGCCCGCCAACGCTTCTACGACGCCCT |
| 10             | Ms_murA_4934_99bp_F         | GGTCCTGGTGTAGATGCGAG             |
| 11             | Ms_topA_6160_F              | TGGCGTAGCGGATTATCGTC             |
| 12             | Ms_3434_3432_F              | CGTAGTCGACTCTGTCACCG             |
| 13             | 32mer_6200-6300Kb           | GAAAGTATCCGGCGGGACGCTTGCGCAGCAGT |
| 14             | 32mer_4900-5100Kb           | TCCCGTCGATATGGACTCTTGGGGAAGATCAG |
| 15             | 32mer_3700-3900Kb           | AGTGAGCTATTACGCACTCTTTCAAGGGTGGC |

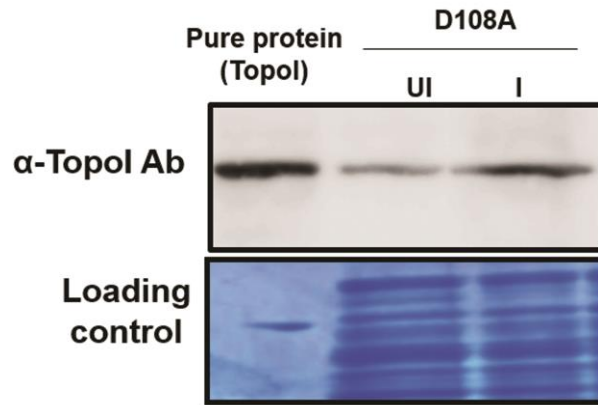

**Figure S1.**

Immunoblot showing MsTopoI D108A induction. MsTopoI D108A expression was induced by the addition of 25 ng/ml of tetracyclin for 4h. The expression was analysed using anti-TopoI antibodies. Lower panel shows the duplicate gel stained with Coomassie blue. UI= uninduced, I= induced.

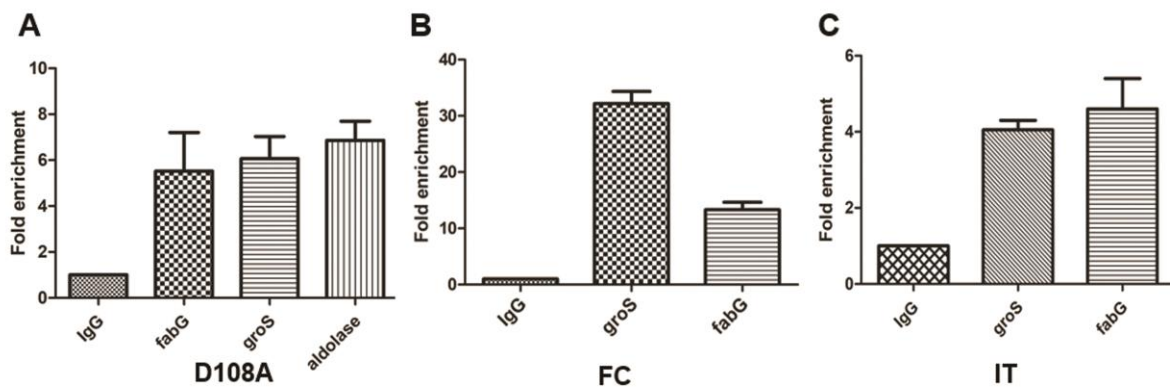

**Figure S2.**

ChIP qPCR to assess the TopoI enrichment on selected genes as described in Materials and Methods. D108A (A), FC (B) and IT (C). The data represented is mean $\pm$ SD from three independent experiments.

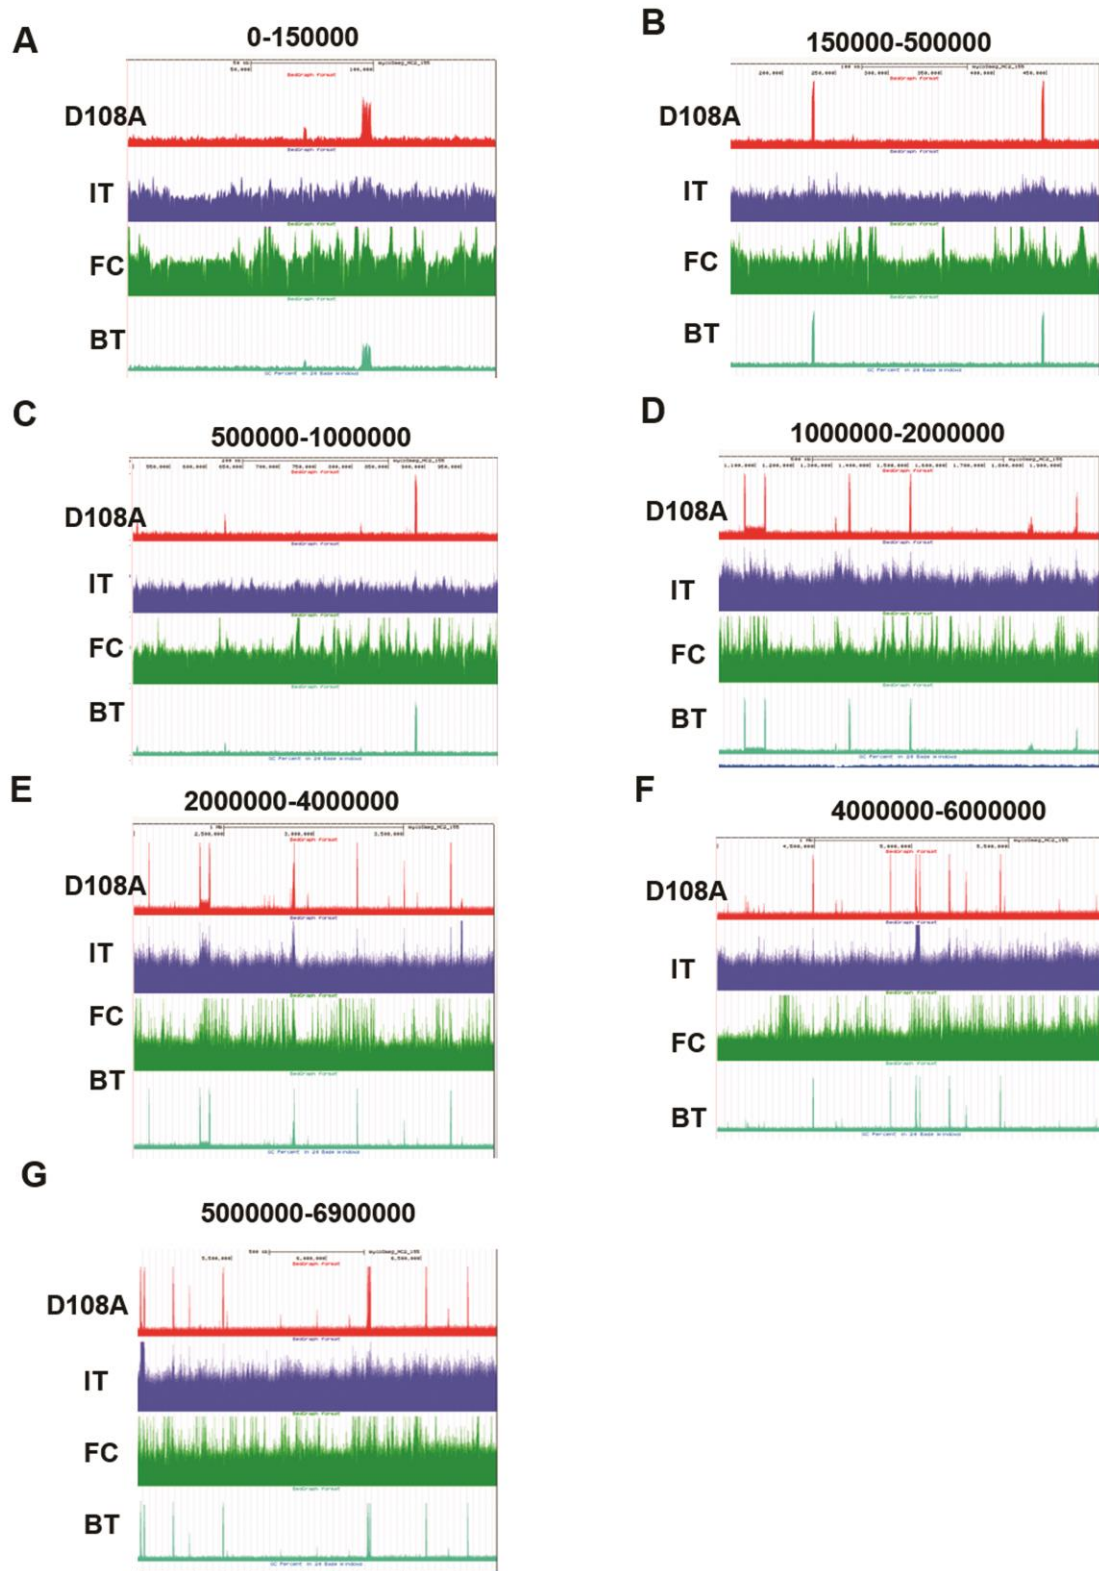

**Figure S3.**

TopoI binding and cleavage sites *M. smegmatis* (mc<sup>2</sup> 155) genome. UCSC browser zooms of different genomic coordinates- 0-0.15 Mb (A), 0.15 Mb- 0.5 Mb (B), 0.5 Mb-1 Mb (C), 1-2 Mb (D), 2-4 Mb (E), 4-6 Mb (F) and 5-6.9 Mb (G).

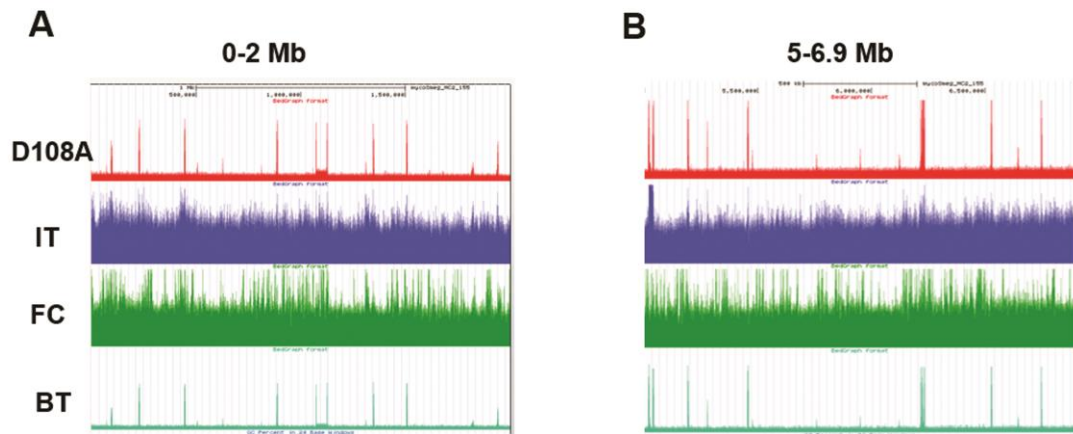

**Figure S4**

TopoI functional sites near Ori of *M. smegmatis* (mc<sup>2</sup> 155) genome. UCSC browser zooms for Ori region depicting the specific binding and cleavage peaks for TopoI in 0-2 Mb genomic coordinates (A) and 5Mb-6.9 Mb (B).

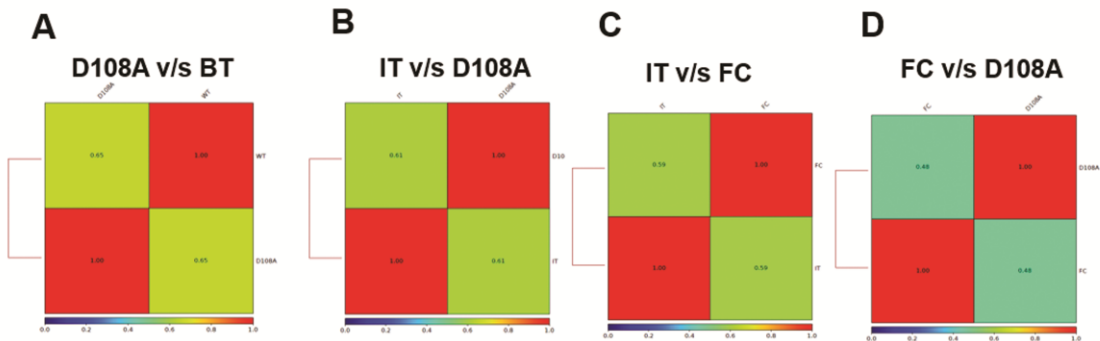

**Figure S5.**

Calculation of correlation coefficient. Pearson correlation coefficient between D108A and BT (A), IT and D108A (B), IT and FC (C), and FC and D108A (D) ChIP-seq data.

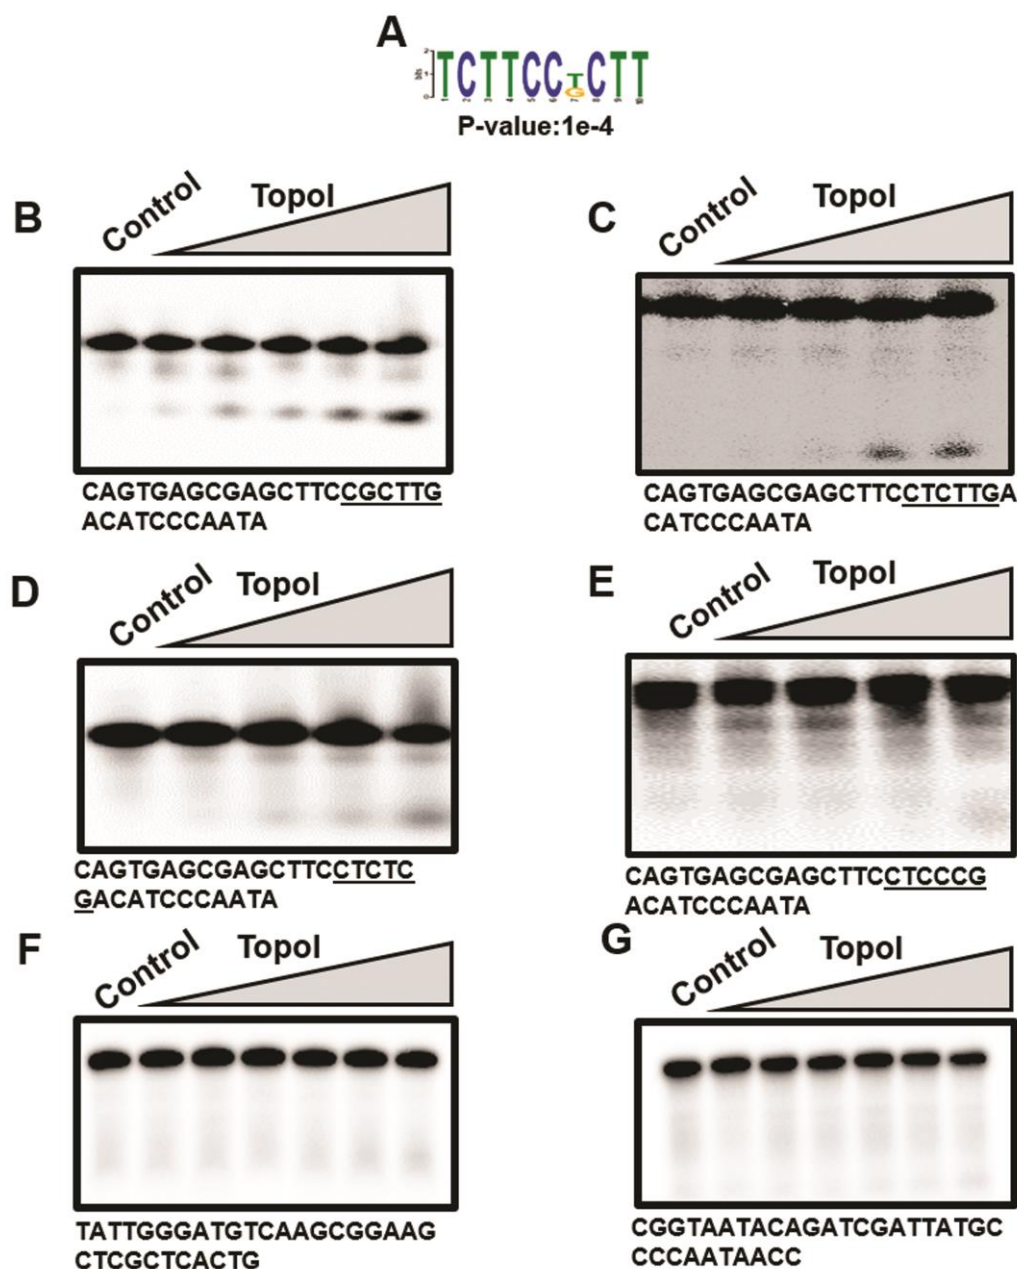

**Figure S6.**

DNA TopoI cleavage motif and cleavage analysis. (A) Motif generated from cleavage sites *in vivo* using MEME suite. (B) Cleavage assay was performed with consensus motif containing oligonucleotides with increasing concentration of MsTopoI (0.01-0.16  $\mu$ M) and the resultant products were analysed on 8M urea 12% polyacrylamide gel. (C, D and E) Cleavage assay with oligonucleotides having substitutions in consensus motif. With more substitutions cleavage is diminished. (F) Cleavage assay with the oligonucleotides designed from the region lacking both binding and cleavage peaks. (G) Cleavage assay with nonspecific oligonucleotides taken from the laboratory stock, which of non-mycobacterial origin.
